# Supplementary material
Source: ML conference proceedings conference paper supplement (https://aclanthology.org/D18-1216)
Supplement: Attachment [file D18-1216.Attachment.zip]

## A1 Generating machine rationales

Collecting rationales at scale is expensive. Thus, we employ an existing rationalization model (Lei et al., 2016) to generate high-quality rationales automatically for the resource-rich source tasks.

The rationalization model is composed of two modular components: a generator and a classifier. The generator generates rationales from the input, and the classifier maps the generated rationales into the final label. The two components are trained jointly to minimize a loss function that favors short, concise rationales while enforcing that the rationales alone suffice for accurate prediction.

Figure 8 illustrates the model architecture. For the generator, we use a 200 dimensional bi-LSTM to encode the word embedding sequence. Then we apply a linear regressor at each position  $i$  to predict the probability  $p_i$  that the current word is a rationale. We sample  $z_i$  from this probability and pass the sampled rationales  $z_i x_i$  to the classifier module. To encourage fast and stable convergence, we use the Gumbel trick (Jang et al., 2016) during sampling.

For the classifier, we employ a CNN-based model (Kim, 2014). Specifically, the classifier first computes 1D convolution over the embeddings of the generated rationales. The filter windows are 3, 5, 7 with 50 feature maps each. It then applies max-over-time pooling to obtain a fixed-length feature vector. Finally, a multilayer perceptron (MLP) is used to predict the label from the feature vector. The MLP consists of one hidden

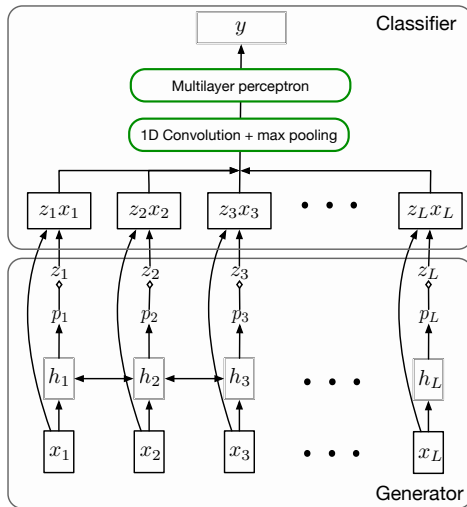

Figure 8: Rationalization model (Lei et al., 2016). Arrow line denotes deterministic computations, while diamond line denotes stochastic sampling.

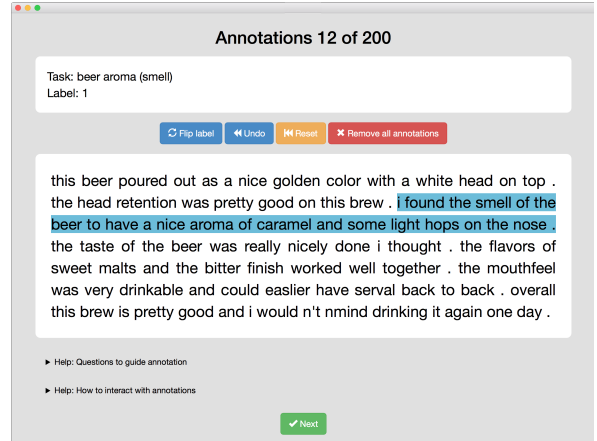

Figure 9: Screenshot of the annotation tool

| Task              | #tokens per review | #rationales per review | #unique tokens | #unique rationales |
|-------------------|--------------------|------------------------|----------------|--------------------|
| Beer look         | 125.4              | 21.4                   | 35,025         | 6,460              |
| Beer aroma        | 126.3              | 17.6                   | 35,088         | 5,611              |
| Beer palate       | 133.5              | 13.0                   | 36,786         | 3,885              |
| Hotel location    | 157.1              | 13.4                   | 42,717         | 4,174              |
| Hotel cleanliness | 149.4              | 13.2                   | 42,045         | 4,758              |
| Hotel service     | 154.5              | 17.5                   | 42,989         | 6,110              |

Table 7: Statistics of the annotated rationales.

layer (50 units and ReLU activation).

## A2 Collecting human rationales

We collected human rationales on six sentiment classification tasks: beer look, beer aroma, beer palate, hotel location, hotel cleanliness and hotel service. For each task, we randomly picked 100 positive examples and 100 negative examples. These 200 labeled examples are given to the annotators (five students) to highlight rationales that are short and coherent, yet sufficient for supporting the label (Lei et al., 2016). The annotators can also flip the original label if it is incorrect. Figure 9 shows our annotation interface, and Table 7 presents the statistics of the collected rationales.

## A3 Deriving the oracle attention

Figure 10 illustrates the model architecture that we used to derive the oracle attention. It has the same architecture as the source classifier in our R2A model (Section 3.1). Specifically, we use pre-trained fastText embeddings. The encoder is a bi-LSTM with 200 hidden units. The attention head  $q$  is a vector of dimension 50. For the prediction module  $\text{pred}$ , we use a MLP with one hidden

|                  | Beer   |        |        | Hotel    |             |         |
|------------------|--------|--------|--------|----------|-------------|---------|
|                  | Look   | Aroma  | Palate | Location | Cleanliness | Service |
| #training data   | 32,276 | 28,984 | 25,748 | 14,472   | 150,098     | 101,484 |
| #testing data    | 4,014  | 4,212  | 3,804  | 1,808    | 12,684      | 18,762  |
| Testing accuracy | 87.17  | 86.35  | 82.02  | 92.20    | 94.62       | 95.17   |

Table 8: Data used to derive the oracle attention. The accuracy is evaluated on the testing data shown in Table 1 and 2.

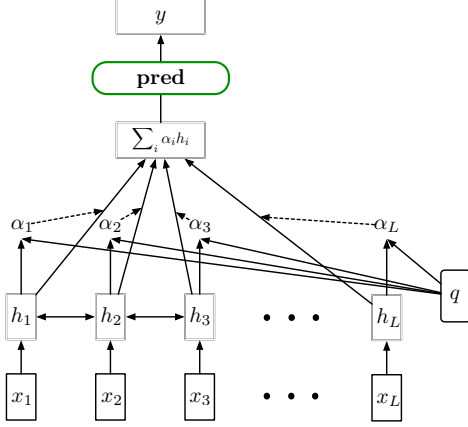

Figure 10: Attention-based classifier

layer (50 units and ReLU activation). For each task, we train this attention-based classifier on a large amount of annotations. Table 8 presents the statistics of the training data and the testing performance of the classifier.

#### A4 Estimating the Wasserstein distance

We train a critic network to estimate the Wasserstein distance between the distribution of the representation from the source domain and the one from the target domain:

$$\mathcal{L}_{wd} = \sup_{\|f\|_L \leq K} \mathbb{E}_{h^{\text{inv}} \sim \mathbb{P}_{\mathcal{S}}} \left[ f([h_1^{\text{inv}}; h_L^{\text{inv}}]) \right] - \mathbb{E}_{h^{\text{inv}} \sim \mathbb{P}_{\mathcal{T}}} \left[ f([h_1^{\text{inv}}; h_L^{\text{inv}}]) \right].$$

The critic network is parametrized as a MLP with one hidden layer (100 units and ReLU activation). Following Gulrajani et al. (2017), we set the weight of the gradient penalty to 10 and optimize the critic network for 5 iterations during each batch. Figure 11 plots the loss on the development set versus the number of training batches. We see that our R2A model converges smoothly during training.

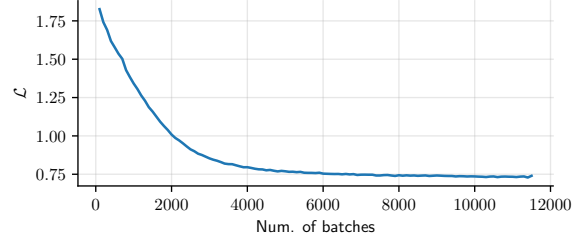

Figure 11: Domain transfer from beer review to hotel review. Overall loss  $\mathcal{L}$  of R2A on the source development set during training.
